# Supplementary material for: Earth Worming—An Evaluation of Earthworm (Eisenia andrei) as an Alternative Food Source
Source: MDPI journal article supplement (doi:10.3390/foods12101948), 2023-05-10
Supplement: s1 [file s1]

# Earth Worming— An Evaluation of Earthworm (*Eisenia andrei*) as an Alternative Food Source

## Supplementary Materials

**Table S1.** The protein yield and purity of EAPPE was expressed in % DW.

|              | Yield     | Purity    |
|--------------|-----------|-----------|
| <b>EAPPE</b> | 22.1 0.27 | 78.7 0.71 |
